# Supplementary material
Source: PubMed Central journal article supplement (PMC3887797)
Supplement: molcell-33-4-415-13-supplementary.pdf [file molcell-33-4-415-13-supplementary.pdf]

**Supplementary table 1.** *Capsicum* species used for analysis of CaSD1 repeat regions.

| Species                    |   | Cultivar            |
|----------------------------|---|---------------------|
| <i>Capsicum annuum</i>     | 1 | Bukang              |
|                            | 2 | CM334               |
|                            | 3 | ECW30R              |
|                            | 4 | Chilsungcho         |
| <i>Capsicum baccatum</i>   | 1 | Dedo de moca        |
|                            | 2 | Javitott bogyiszloi |
|                            | 3 | Aji Limon           |
|                            | 4 | Omnicolor           |
| <i>Capsicum chacoense</i>  | 1 | CO 1727             |
|                            | 2 | EU021               |
|                            | 3 | C04398-A            |
|                            | 4 | C05641              |
| <i>Capsicum chinense</i>   | 1 | Habanero (red)      |
|                            | 2 | BISBAS              |
|                            | 3 | Numex Suave Orange  |
|                            | 4 | Bhut Jolokia        |
| <i>Capsicum frutescens</i> | 1 | Tabasco             |
|                            | 2 | Cipanas             |
|                            | 3 | C00088              |
|                            | 4 | 9148                |

**Supplementary table 2.** List of primers used for PCR amplification.

| Primer name  | Forward sequence (5'→3')                 | Reverse sequence (5'→3')             | Reference          |
|--------------|------------------------------------------|--------------------------------------|--------------------|
| CaSD1_full   | CGGGATCCCGATGGTGTCTCAGGTAG<br>TTTCAATATT | GGAGCTCGTATTGTTTCATTTGTGA<br>GGAAAGA | In this study      |
| CaSD1_repeat | TCCAGAACAAAATCATAAGAGAAGC                | AGCACGATTATGTAGAATCCAAAAG            | In this study      |
| CaSD1_RT     | AAAGGACTATGAGCGCAAGC                     | TTGTGAGGAAAGACCGATCA                 | In this study      |
| CaActin      | CCACCTCTTCACTCTCTGCTCT                   | ACTAGGAAAAACAGCCCTTGGT               | Yeom et al., 2011a |
| NbHin1       | GAGCTATGTATCAAGGCCAGAG                   | GCTTCACTTCCATCTCAAAAAC               | AF212183           |
| NtSgr        | AAAGAACTCCCTGTGGTTCTGA                   | AATCCCAGTTGCTATTGCTTGT               | EU294209.1         |
| NtCAB        | ACAGAGCTCTTGAGGTTATCCA                   | CACAACCTGAAAACCTAGCACA               | AY554168.1         |
| NbActin      | CCAGGTATTGCTGATAGAATGAG                  | CTGAGGGAAGCCAAGATAGAG                | Yoon et al., 2009  |
| NtCYCD3;1    | AAATGATTCATGGGATTTGGAG                   | CAACCACCAGCTAAGCTCTTCT               | AB243209.1         |
| NtCYCA       | TTCAAACCAGTCCAATCACTG                    | AAGCCTTCACATTTCCACCTAA               | D50736.1           |
| NtCDKA;4     | TCCTGTTGATGTGTGGTCAG                     | GCGGAGCATTTTATCAAGAA                 | AF289467.1         |
| NtCDKB1-1    | AATGGACGAAGAAGGGATTC                     | TGAGAGAAGGAGGGAGAGGT                 | AF289465.1         |
| NtMCM        | AGACCGCCTTAGCTCTTGCG                     | TGAGGAATTATCTCAGGGTC                 | Park et al., 2005  |
